# Supplementary material
Source: publisher figshare collection journal article supplement (https://acs.figshare.com/ndownloader/files/5105953)
Supplement: Supplementary file 1 [file 5105953]

## SUPPLEMENTAL INFORMATION

### Polypeptide Templated Synthesis of Hexagonal Silica Platelets (Tomczak *et al.*)

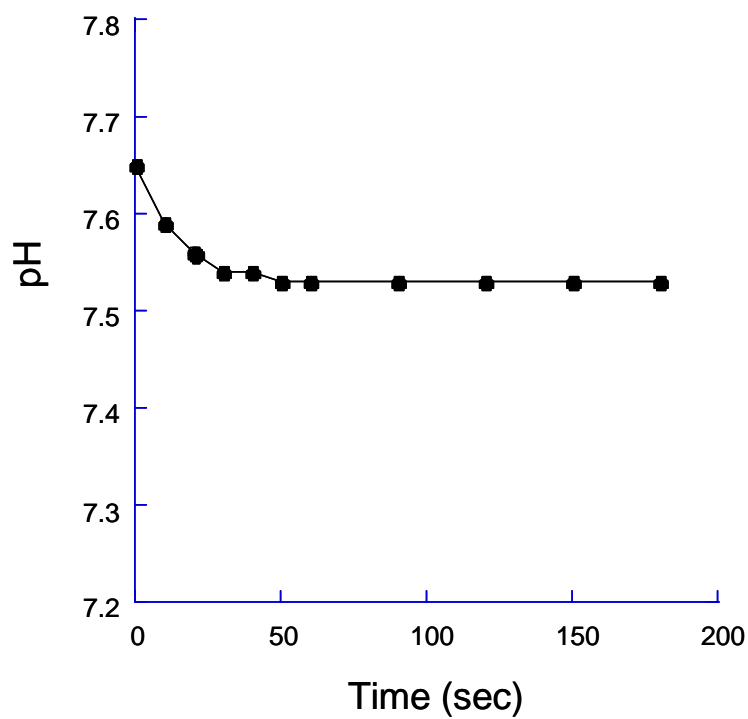

**Fig S1.** The pH of the silicification reaction in the presence of PLL<sub>222</sub>. Silicic acid is added to the PLL solution in 0.1 sodium phosphate buffer pH 7.5 at t = 0.

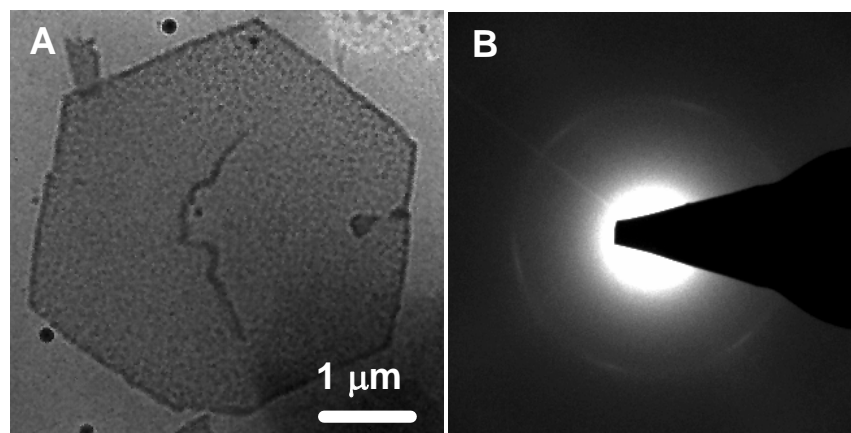

**Fig. S2.** (A) TEM micrograph of PLL crystal. (B) Electron diffraction pattern.

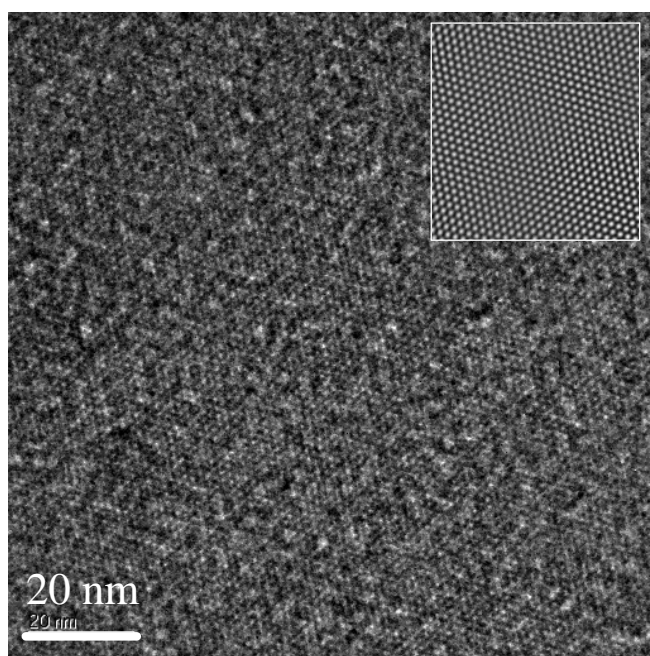

**Fig. S3.** High resolution TEM micrograph of a silica coated PLL crystal on an amorphous carbon substrate. The local hexagonal symmetry of the underlying PLL template is visible. Inset, Fourier filtered image showing the hexagonal packing of the pores.
